# Supplementary material for: Prevalence of anemia in patients with chronic kidney disease in Japan: A nationwide, cross-sectional cohort study using data from the Japan Chronic Kidney Disease Database (J-CKD-DB)
Source: PubMed Central journal article supplement (PMC7371174; doi:10.1371/journal.pone.0236132), 2020-07-20
Supplement: pone.0236132.s001.pdf [file pone.0236132.s001.pdf]

**S1 Table. Participant Stratification According to eGFR Category, Age, and Sex Strata.**

|                                        | eGFR category      |                   |                   |                 | Subtotal          |
|----------------------------------------|--------------------|-------------------|-------------------|-----------------|-------------------|
|                                        | G3a                | G3b               | G4                | G5              |                   |
| eGFR range, ml/min/1.73 m <sup>2</sup> | 45–59              | 30–44             | 15–29             | <15             | <60               |
| Patients                               | 23,333             | 8,357             | 2,710             | 1,108           | 35,508            |
| Prevalence                             | 65.7%              | 23.5%             | 7.6%              | 3.1%            |                   |
| Age                                    |                    |                   |                   |                 |                   |
| 18–44 years                            | 718<br>(61.2%)     | 223<br>(19.0%)    | 131<br>(11.2%)    | 101<br>(8.6%)   | 1,173             |
| 45–64 years                            | 5,815<br>(73.0%)   | 1,330<br>(16.7%)  | 489<br>(6.1%)     | 332<br>(4.2%)   | 7,966             |
| 65–74 years                            | 8,146<br>(70.1%)   | 2,472<br>(21.3%)  | 688<br>(5.9%)     | 322<br>(2.8%)   | 11,628            |
| 75–84 years                            | 6,994<br>(61.8%)   | 3,131<br>(27.7%)  | 908<br>(8.0%)     | 276<br>(2.4%)   | 11,309            |
| ≥85 years                              | 1,660<br>(48.4%)   | 1,201<br>(35.0%)  | 494<br>(14.4%)    | 77<br>(2.2%)    | 3,432             |
| Sex                                    |                    |                   |                   |                 |                   |
| Men                                    | 12,661<br>(65.4%)  | 4,614<br>(23.8%)  | 1,434<br>(7.4%)   | 651<br>(3.4%)   | 19,360            |
| Women                                  | 10,672<br>(66.1%)  | 3,743<br>(23.2%)  | 1,276<br>(7.9%)   | 457<br>(2.8%)   | 16,148            |
| Dipstick proteinuria                   |                    |                   |                   |                 |                   |
| (-)                                    | 6,652<br>(71.1%)   | 2,133<br>(22.8%)  | 533<br>(5.7%)     | 39<br>(0.4%)    | 9,357             |
| (±)                                    | 1,302<br>(56.7%)   | 693<br>(30.2%)    | 257<br>(11.2%)    | 43<br>(1.9%)    | 2,295             |
| (1+)                                   | 778<br>(42.1%)     | 592<br>(32.0%)    | 358<br>(19.4%)    | 121<br>(6.5%)   | 1,849             |
| (2+)                                   | 409<br>(32.0%)     | 401<br>(31.4%)    | 309<br>(24.2%)    | 158<br>(12.4%)  | 1,277             |
| (3+)                                   | 121<br>(20.2%)     | 164<br>(27.4%)    | 189<br>(31.6%)    | 124<br>(20.7%)  | 598               |
| (4+)                                   | 14<br>(21.2%)      | 25<br>(37.9%)     | 18<br>(27.3%)     | 9<br>(13.6%)    | 66                |
| Not Examined                           | 14,057<br>(60.2%)* | 4,349<br>(52.0%)* | 1,046<br>(38.6%)* | 614<br>(55.4%)* | 20,066<br>(56.5%) |

\*Prevalence of each eGFR category

Abbreviations: eGFR, estimated glomerular filtration rate
