# Supplementary material for: Prevalence of anemia in patients with chronic kidney disease in Japan: A nationwide, cross-sectional cohort study using data from the Japan Chronic Kidney Disease Database (J-CKD-DB)
Source: PubMed Central journal article supplement (PMC7371174; doi:10.1371/journal.pone.0236132), 2020-07-20
Supplement: pone.0236132.s002.pdf [file pone.0236132.s002.pdf]

**S2 Table. Mean Hemoglobin Levels According to G Category, Age, and Sex Strata.**

| Total           |      | 18–44 Y              | 45–64 Y             | 65–74 Y              | 75–84 Y              | ≥85 Y                | Subtotal            |
|-----------------|------|----------------------|---------------------|----------------------|----------------------|----------------------|---------------------|
| G3a             | Mean | 13.72                | 13.89               | 13.60 <sup>†</sup>   | 13.06 <sup>†</sup>   | 12.42 <sup>†</sup>   | 13.44               |
|                 | SD   | 2.07                 | 1.68                | 1.56                 | 1.59                 | 1.58                 | 1.67                |
| G3b             | Mean | 12.70 <sup>*†</sup>  | 13.22 <sup>*</sup>  | 12.95 <sup>*†</sup>  | 12.43 <sup>*†</sup>  | 11.88 <sup>*†</sup>  | 12.64 <sup>*</sup>  |
|                 | SD   | 2.51                 | 2.06                | 1.83                 | 1.82                 | 1.75                 | 1.93                |
| G4              | Mean | 11.98 <sup>*</sup>   | 12.08 <sup>*</sup>  | 11.90 <sup>*</sup>   | 11.36 <sup>*†</sup>  | 10.86 <sup>*†</sup>  | 11.57 <sup>*</sup>  |
|                 | SD   | 2.09                 | 2.09                | 2.00                 | 1.73                 | 1.68                 | 1.93                |
| G5              | Mean | 11.32 <sup>*</sup>   | 11.21 <sup>*</sup>  | 10.89 <sup>*</sup>   | 10.62 <sup>*†</sup>  | 9.95 <sup>*†</sup>   | 10.90 <sup>*</sup>  |
|                 | SD   | 1.73                 | 1.85                | 1.62                 | 1.63                 | 1.64                 | 1.74                |
| Overall         | Mean | 13.12 <sup>†</sup>   | 13.54               | 13.28 <sup>†</sup>   | 12.69 <sup>†</sup>   | 11.94 <sup>†</sup>   | 13.02 <sup>*</sup>  |
|                 | SD   | 2.29                 | 1.92                | 1.76                 | 1.77                 | 1.77                 | 1.88                |
| Men             |      | 18–44 Y              | 45–64 Y             | 65–74 Y              | 75–84 Y              | ≥85 Y                | Subtotal            |
| G3a             | Mean | 14.85 <sup>†</sup>   | 14.59               | 14.11 <sup>†</sup>   | 13.55 <sup>†</sup>   | 12.80 <sup>†</sup>   | 14.01               |
|                 | SD   | 1.73                 | 1.59                | 1.55                 | 1.62                 | 1.62                 | 1.67                |
| G3b             | Mean | 13.70 <sup>*</sup>   | 13.85 <sup>*</sup>  | 13.47 <sup>*†</sup>  | 12.87 <sup>*†</sup>  | 12.17 <sup>*†</sup>  | 13.16 <sup>*</sup>  |
|                 | SD   | 2.80                 | 2.04                | 1.83                 | 1.93                 | 1.78                 | 1.99                |
| G4              | Mean | 12.52 <sup>*</sup>   | 12.49 <sup>*</sup>  | 12.40 <sup>*</sup>   | 11.71 <sup>*†</sup>  | 11.14 <sup>*†</sup>  | 11.99 <sup>*</sup>  |
|                 | SD   | 2.07                 | 2.25                | 2.06                 | 1.84                 | 1.74                 | 2.04                |
| G5              | Mean | 11.53 <sup>*</sup>   | 11.35 <sup>*</sup>  | 11.01 <sup>*</sup>   | 10.64 <sup>*†</sup>  | 10.25 <sup>*†</sup>  | 11.03 <sup>*</sup>  |
|                 | SD   | 1.70                 | 1.90                | 1.65                 | 1.68                 | 1.68                 | 1.78                |
| Overall (men)   | Mean | 14.04                | 14.17               | 13.77 <sup>†</sup>   | 13.13 <sup>†</sup>   | 12.27 <sup>†</sup>   | 13.55               |
|                 | SD   | 2.31                 | 1.93                | 1.78                 | 1.86                 | 1.82                 | 1.94                |
| Women           |      | 18–44 Y              | 45–64 Y             | 65–74 Y              | 75–84 Y              | ≥85 Y                | Subtotal            |
| G3a             | Mean | 12.58 <sup>†‡</sup>  | 13.05 <sup>‡</sup>  | 12.93 <sup>†‡</sup>  | 12.49 <sup>†‡</sup>  | 12.06 <sup>†‡</sup>  | 12.74 <sup>‡</sup>  |
|                 | SD   | 1.72                 | 1.38                | 1.29                 | 1.35                 | 1.46                 | 1.40                |
| G3b             | Mean | 11.81 <sup>*†‡</sup> | 12.39 <sup>*‡</sup> | 12.18 <sup>*†‡</sup> | 11.87 <sup>*†‡</sup> | 11.60 <sup>*†‡</sup> | 12.00 <sup>*‡</sup> |
|                 | SD   | 1.84                 | 1.78                | 1.53                 | 1.50                 | 1.67                 | 1.62                |
| G4              | Mean | 11.46 <sup>*‡</sup>  | 11.56 <sup>*‡</sup> | 11.23 <sup>*‡</sup>  | 10.98 <sup>*†‡</sup> | 10.59 <sup>*†‡</sup> | 11.09 <sup>*‡</sup> |
|                 | SD   | 2.00                 | 1.76                | 1.70                 | 1.50                 | 1.57                 | 1.67                |
| G5              | Mean | 11.01 <sup>*</sup>   | 11.01 <sup>*</sup>  | 10.70 <sup>*</sup>   | 10.57 <sup>*</sup>   | 9.64 <sup>*†</sup>   | 10.71 <sup>*‡</sup> |
|                 | SD   | 1.74                 | 1.77                | 1.55                 | 1.55                 | 1.54                 | 1.67                |
| Overall (women) | Mean | 12.19 <sup>†‡</sup>  | 12.76 <sup>‡</sup>  | 12.61 <sup>†‡</sup>  | 12.15 <sup>†‡</sup>  | 11.64 <sup>†‡</sup>  | 12.38 <sup>‡</sup>  |
|                 | SD   | 1.85                 | 1.59                | 1.49                 | 1.50                 | 1.66                 | 1.59                |

\*:p<0.05 vs. G3a, <sup>†</sup>:p<0.05 vs. 45–64 Y, <sup>‡</sup>:P<0.05 vs. Men

Mean hemoglobin levels (g/dl) are expressed as mean and SD, and were analyzed by one-way analysis of variance.

Abbreviations: SD, standard deviation
