# Supplementary material for: Prevalence of anemia in patients with chronic kidney disease in Japan: A nationwide, cross-sectional cohort study using data from the Japan Chronic Kidney Disease Database (J-CKD-DB)
Source: PubMed Central journal article supplement (PMC7371174; doi:10.1371/journal.pone.0236132), 2020-07-20
Supplement: pone.0236132.s003.pdf [file pone.0236132.s003.pdf]

**S3 Table. Mean Hemoglobin Levels According to A Category Strata.**

| Total   |      | A1                 | A2                 | A3                  | Subtotal |
|---------|------|--------------------|--------------------|---------------------|----------|
| G3a     | Mean | 13.51              | 13.54              | 13.69 <sup>†</sup>  | 13.37    |
|         | SD   | 1.55               | 1.83               | 1.90                | 1.69     |
| G3b     | Mean | 12.75 <sup>*</sup> | 12.77 <sup>*</sup> | 12.93 <sup>*†</sup> | 12.49    |
|         | SD   | 1.73               | 1.92               | 1.97                | 1.99     |
| G4      | Mean | 11.48 <sup>*</sup> | 11.51 <sup>*</sup> | 11.85 <sup>*†</sup> | 11.40    |
|         | SD   | 1.60               | 1.76               | 1.98                | 2.06     |
| G5      | Mean | 10.15 <sup>*</sup> | 10.39 <sup>*</sup> | 10.61 <sup>*</sup>  | 11.19    |
|         | SD   | 1.39               | 1.65               | 1.59                | 1.81     |
| Overall | Mean | 13.20              | 13.00 <sup>†</sup> | 12.68 <sup>†</sup>  | 13.01    |
|         | SD   | 1.70               | 2.00               | 2.16                | 1.89     |

\*:p<0.05 vs. G3a, †:p<0.05 vs. A1

Mean hemoglobin levels (g/dl) are expressed as mean and SD, and were analyzed by one-way analysis of variance.

Abbreviations: SD, standard deviation
