# Supplementary material for: Prevalence of anemia in patients with chronic kidney disease in Japan: A nationwide, cross-sectional cohort study using data from the Japan Chronic Kidney Disease Database (J-CKD-DB)
Source: PubMed Central journal article supplement (PMC7371174; doi:10.1371/journal.pone.0236132), 2020-07-20
Supplement: pone.0236132.s004.pdf [file pone.0236132.s004.pdf]

**S4 Table. Mean Hemoglobin Levels in All Patients, Patients without Severe Proteinuria and without High Inflammatory Levels.**

|     |      | All patients | Patients without<br>UTP $\geq$ 3+ and Alb < 3.0 g/dl | Patients without<br>CRP $\geq$ 5.0 mg/dl |
|-----|------|--------------|------------------------------------------------------|------------------------------------------|
| G3a | Mean | 13.44        | 13.45                                                | 13.44                                    |
|     | n    | 20335        | 20082                                                | 20322                                    |
|     | SD   | 1.67         | 1.66                                                 | 1.67                                     |
| G3b | Mean | 12.64        | 12.68                                                | 12.65                                    |
|     | n    | 7318         | 7128                                                 | 7302                                     |
|     | SD   | 1.93         | 1.89                                                 | 1.92                                     |
| G4  | Mean | 11.57        | 11.63                                                | 11.58                                    |
|     | n    | 2412         | 2274                                                 | 2387                                     |
|     | SD   | 1.93         | 1.89                                                 | 1.92                                     |
| G5  | Mean | 10.90        | 11.01                                                | 10.92                                    |
|     | n    | 1017         | 944                                                  | 994                                      |
|     | SD   | 1.74         | 1.65                                                 | 1.75                                     |

Data are expressed as % of each population.

\*:p<0.05 vs. total

Abbreviations: UTP, dipstick proteinuria; Alb, serum albumin; CRP, serum C-reactive protein
