# Supplementary material for: Prevalence of anemia in patients with chronic kidney disease in Japan: A nationwide, cross-sectional cohort study using data from the Japan Chronic Kidney Disease Database (J-CKD-DB)
Source: PubMed Central journal article supplement (PMC7371174; doi:10.1371/journal.pone.0236132), 2020-07-20
Supplement: pone.0236132.s005.pdf [file pone.0236132.s005.pdf]

**S5 Table. Rates of ESA Non-use among Patients with Hemoglobin  $\leq 11.0$  g/dl According to Chronic Kidney Disease G Category and Age Strata.**

|       |   | 18–44 Y | 45–64 Y | 65–74 Y | 75–84 Y | $\geq 85$ Y       | Subtotal |
|-------|---|---------|---------|---------|---------|-------------------|----------|
| G4    | % | 83.8    | 81.0    | 85.9    | 83.0    | 87.7              | 84.5     |
| G5    | % | 54.8*   | 67.7*   | 62.4*   | 62.9*   | 77.8              | 64.9*    |
| G4+G5 | % | 68.4    | 73.9    | 75.8    | 77.3    | 85.8 <sup>†</sup> | 77.5     |

Data are expressed as % of each population.

\*:p<0.05 vs. G4, <sup>†</sup>:p<0.05 vs. 45–64 Y

Abbreviations: Y, years; Hb, hemoglobin; ESA, erythropoiesis-stimulating agent
